# Supplementary material
Source: publisher figshare collection journal article supplement (https://acs.figshare.com/ndownloader/files/26906425)
Supplement: Supplementary file 1 [file 26906425]

Archive with 7 entries (7 files):
- info.xml
- jp0c10797_high_quality.mp4
- 1016_Permission_From_Photographer_Alexey_Ignatchenko.pdf
- 1700_Model_Release_Person_in_Photograph_Jordan_Walker.pdf
- 1700_Model_Release_Person_in_Photograph_WWB-signed.pdf
- Form_1700_Request_for_permission_to_publish_a_Photograph_signed_by_Alexey_Ignatchenko.pdf
- jp0c10797.pdf
