# Supplementary material
Source: publisher figshare collection journal article supplement (https://acs.figshare.com/ndownloader/files/26906425)
Supplement: Supplementary file 1 [file 26906425 › 1016_Permission_From_Photographer_Alexey_Ignatchenko.pdf]

# Permission Request Form for Use of *Individual and/or Group Photos* in *ACS LiveSlides* from Copyright Owners/Publishers/Photographers Other Than ACS

Date: 2021.03.03

To: Alexey Ignatchenko

Publisher's/Copyright Owner's Contact Information

aignatchenko@sjfc.edu

\_\_\_\_\_

\_\_\_\_\_

Publisher's/Copyright Owner's Email Address

From: Alexey Ignatchenko

Your Name and Complete Mailing Address

83 Kimbark Road

Rochester, NY 14610

\_\_\_\_\_

Your Phone Number Including Country and City Codes

585-385-8385

Your Email Address

aignatchenko@sjfc.edu

Your Specific Deadline Date

I am preparing an *ACS LiveSlides* entitled:

Alkyl Substituted Beta-Keto Acids: Molecular Structure and Decarboxylation Kinetics in Aqueous Solution and on the Surface of Metal Oxides

to appear with

Journal of Physical Chemistry C, doi.org/10.1021/acs.jpcc.0c10797

Title of ACS Publication and DOI

which is published by the American Chemical Society, a not-for-profit membership society and a STM signatory.

I would appreciate your permission to use the following material in all formats including but not limited to print, microform, electronic, and/or CD-ROM from the following reference:

## Individual Photographs of the Following Individuals:

Alexey Ignatchenko, William Brennessel, Jordan Walker, Morgan Springer

\_\_\_\_\_

\_\_\_\_\_

## Collective Photograph (s) representing the following groups:

\_\_\_\_\_

\_\_\_\_\_

If you, the photographer, have a required **credit line**, please include it below:

\_\_\_\_\_

\_\_\_\_\_

For your convenience, you may sign and date the bottom of this letter to indicate your agreement. Please return this form to me at the above email address, by the above **deadline date** (if given above). Thank you.

Agreed: Alexey Ignatchenko

Publisher's/Copyright Owner's Signature or Stamp

Date: 2021.03.03

Date

**SIGN HERE**

Submit completed and signed form with your signed *ACS LiveSlides* Video Release.

7/25/16
