# Supplementary material
Source: publisher figshare collection journal article supplement (https://acs.figshare.com/ndownloader/files/26906425)
Supplement: Supplementary file 1 [file 26906425 › info.xml]

<presentation>
	<article>
		<title>Alkyl Substituted Beta-Keto Acids: Molecular Structure and Decarboxylation Kinetics in Aqueous Solution and on the Surface of Metal Oxides</title>
		<doi>10.1021/acs.jpcc.0c10797</doi>
		<copyright>American Chemical Society</copyright>
		<narrator>Alexey Ignatchenko</narrator>
		<contact>Alexey Ignatchenko</contact>
		<contact-email>aignatchenko@sjfc.edu</contact-email>
		<author-list>
			<author>Alexey V. Ignatchenko</author>
		</author-list>
	</article>
	<slides height-width-ratio=".75">
		<slide audio-time="21">
			<subtitle/>
		</slide>
		<slide audio-time="83">
			<subtitle/>
		</slide>
		<slide audio-time="43">
			<subtitle/>
		</slide>
		<slide audio-time="41">
			<subtitle/>
		</slide>
		<slide audio-time="122">
			<subtitle/>
		</slide>
		<slide audio-time="120">
			<subtitle/>
		</slide>
		<slide audio-time="20">
			<subtitle/>
		</slide>
		<slide audio-time="57">
			<subtitle/>
		</slide>
	</slides>
	<audio duration="507"/>
</presentation>
